# Supplementary material for: Genome sequencing sheds light on the contribution of structural variants to Brassica oleracea diversification
Source: PubMed Central journal article supplement (PMC8097969; doi:10.1186/s12915-021-01031-2), 2021-05-05
Supplement: 12915_2021_1031_MOESM1_ESM.pdf [file 12915_2021_1031_MOESM1_ESM.pdf]

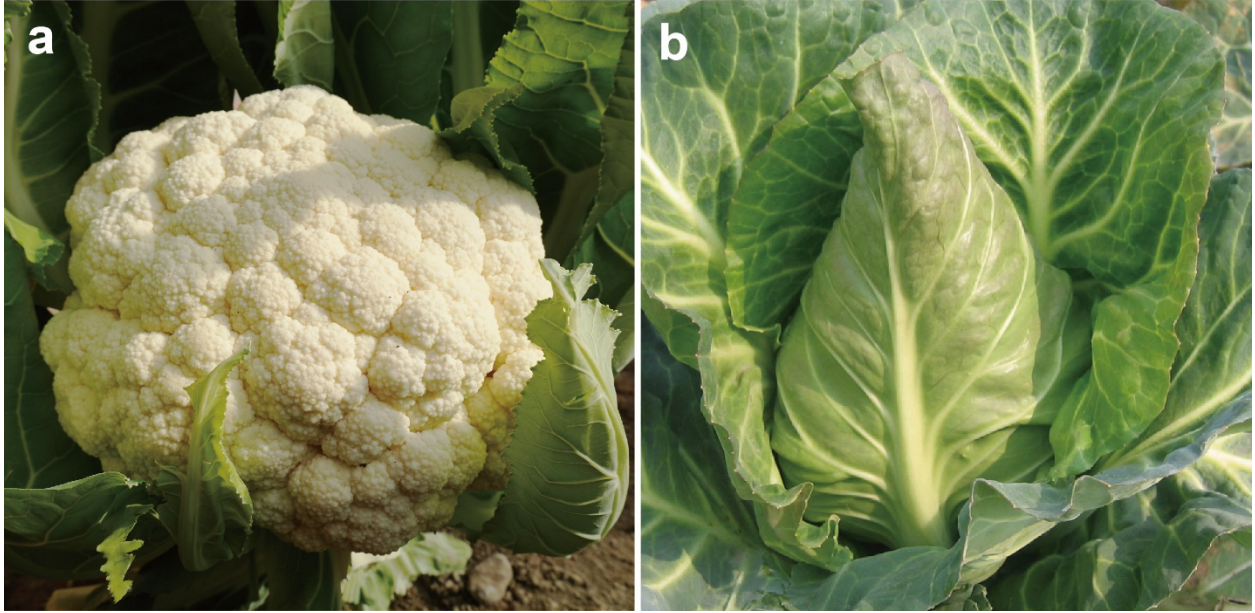

**Figure S1** Morphology of cauliflower Koroso\_1401 (a) and pointed cabbage OX-heart\_923 (b).

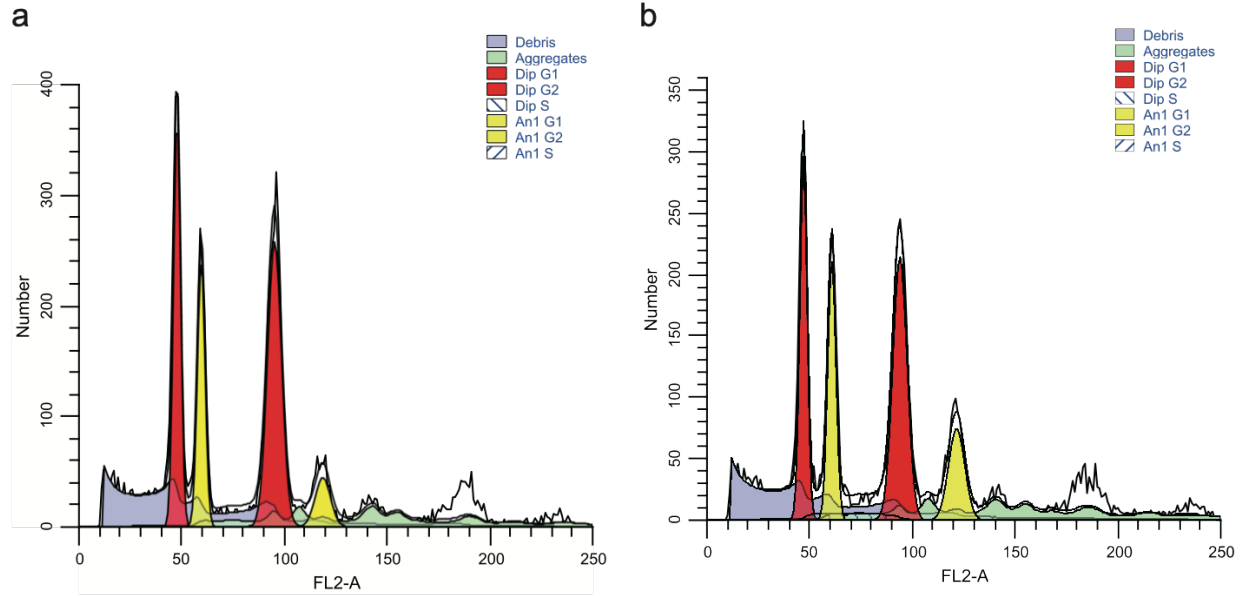

**Figure S2** Genome size estimation using flow cytometry analysis for cauliflower Korso **(a)** and cabbage OX-heart **(b)**. *B. rapa* Chiifu-401-42 was used as the reference. Red peaks represent the reference *B. rapa*, and yellow peaks represent Korso and OX-heart in **(a)** and **(b)**, respectively. Genome sizes of Korso and OX-heart were calculated according to the relative positions of the peaks with the reference *B. rapa*.

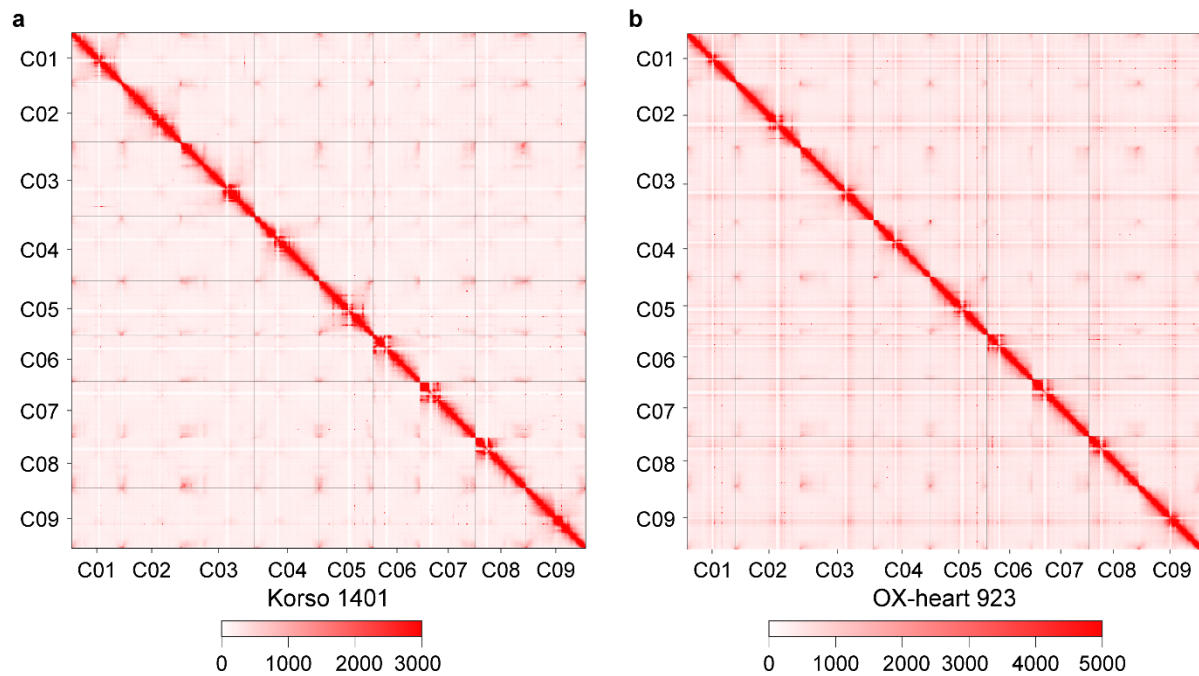

**Figure S3** Chromosome conformation capture of cauliflower Korso and pointed cabbage OX-heart. **a,b**, Hi-C interaction heatmaps of Korso (**a**) and OX-heart (**b**) genomes. The colored bars indicate the intensity of interaction, which represents the normalized count of Hi-C links between 1-Mb bins.

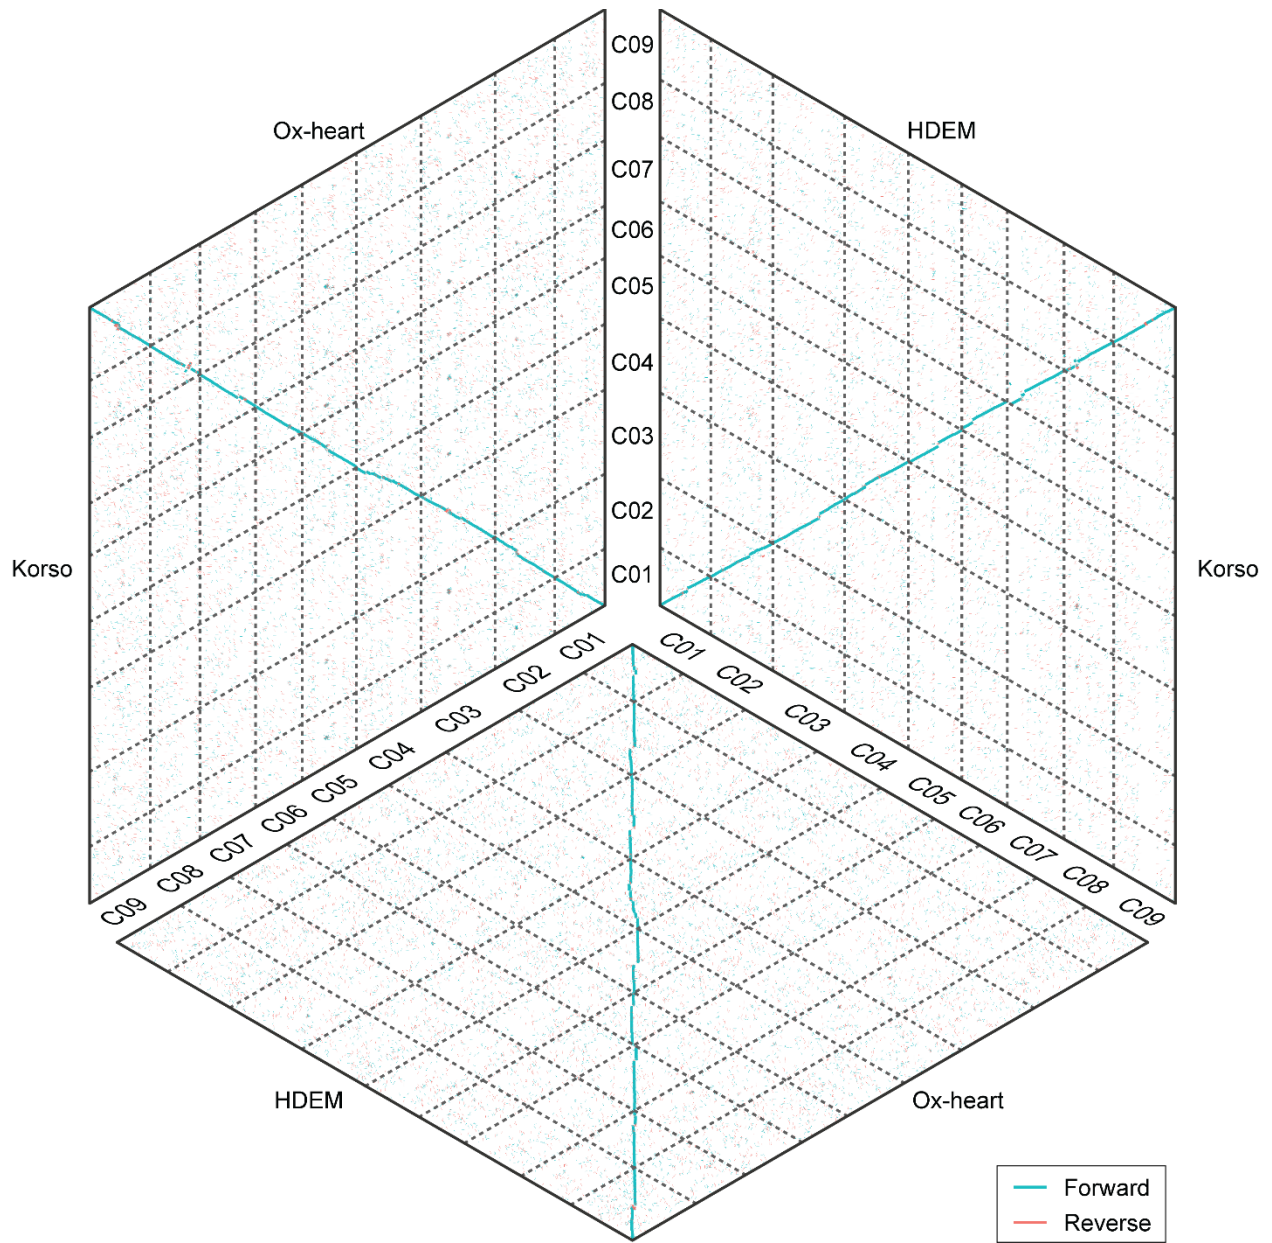

**Figure S4** Pairwise comparisons of the pseudo-chromosomes among cauliflower Korso, cabbage Ox-heart and broccoli HDEM.

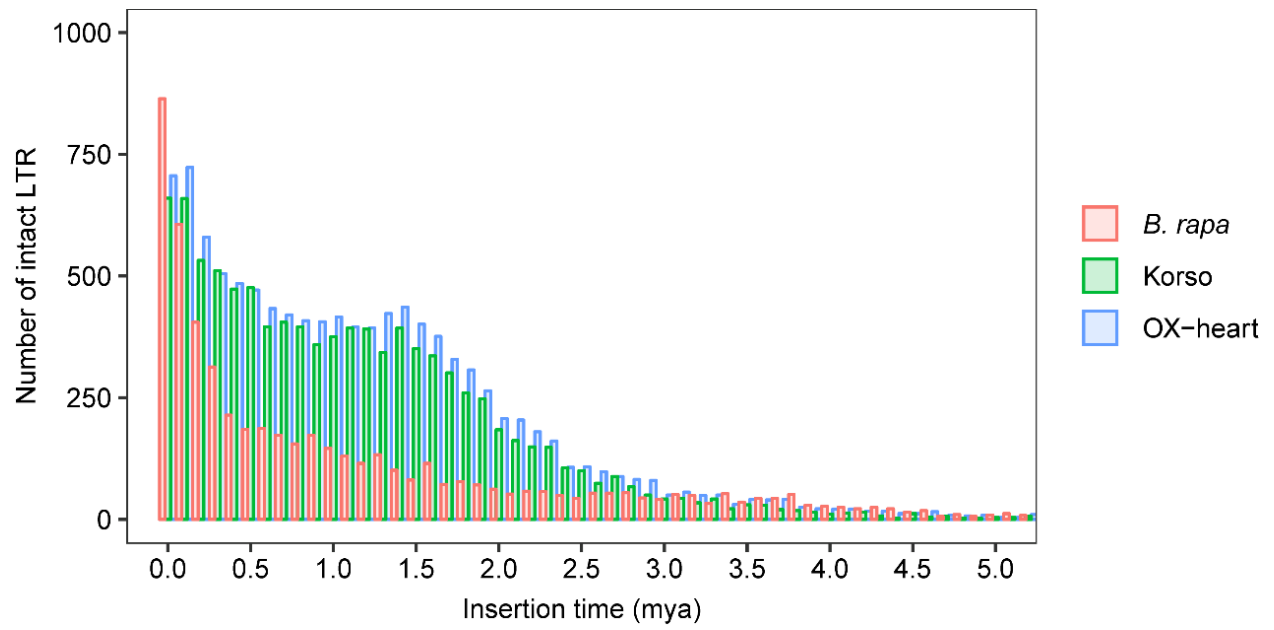

**Figure S5** Distribution of estimated insertion times of intact LTR retrotransposons in Korso, OX-heart and *B. rapa* (v3.0) genomes. MYA, million years ago.

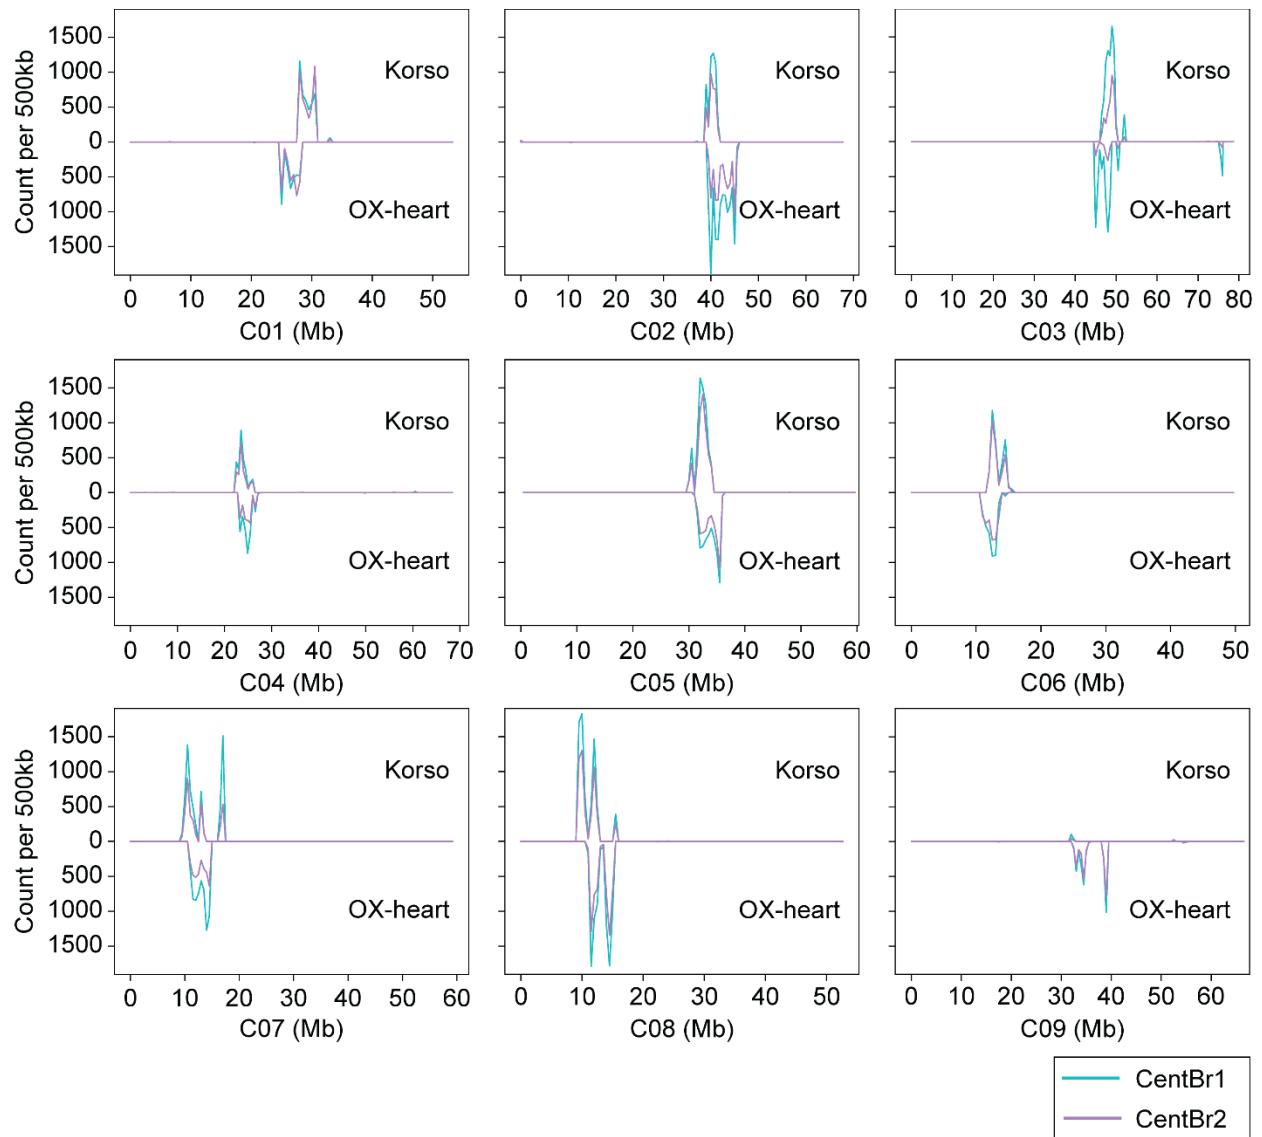

**Figure S6** Distribution of centromeric satellite repeats CentBr 1 and CentBr 2 on the nine chromosomes of Korso and OX-heart.

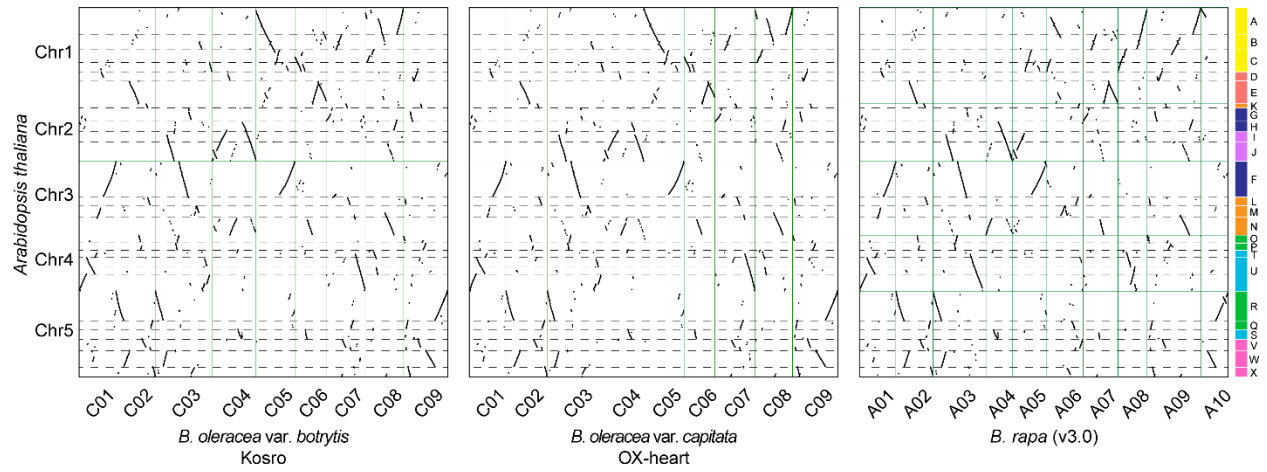

**Figure S7** Segmental collinearity between the *A. thaliana* genome and genomes of Kosro, OX-heart and *B. rapa*. The conserved collinear blocks labeled A to X are color-coded by inferred ancestral chromosomes according to Wang et al. (2011).

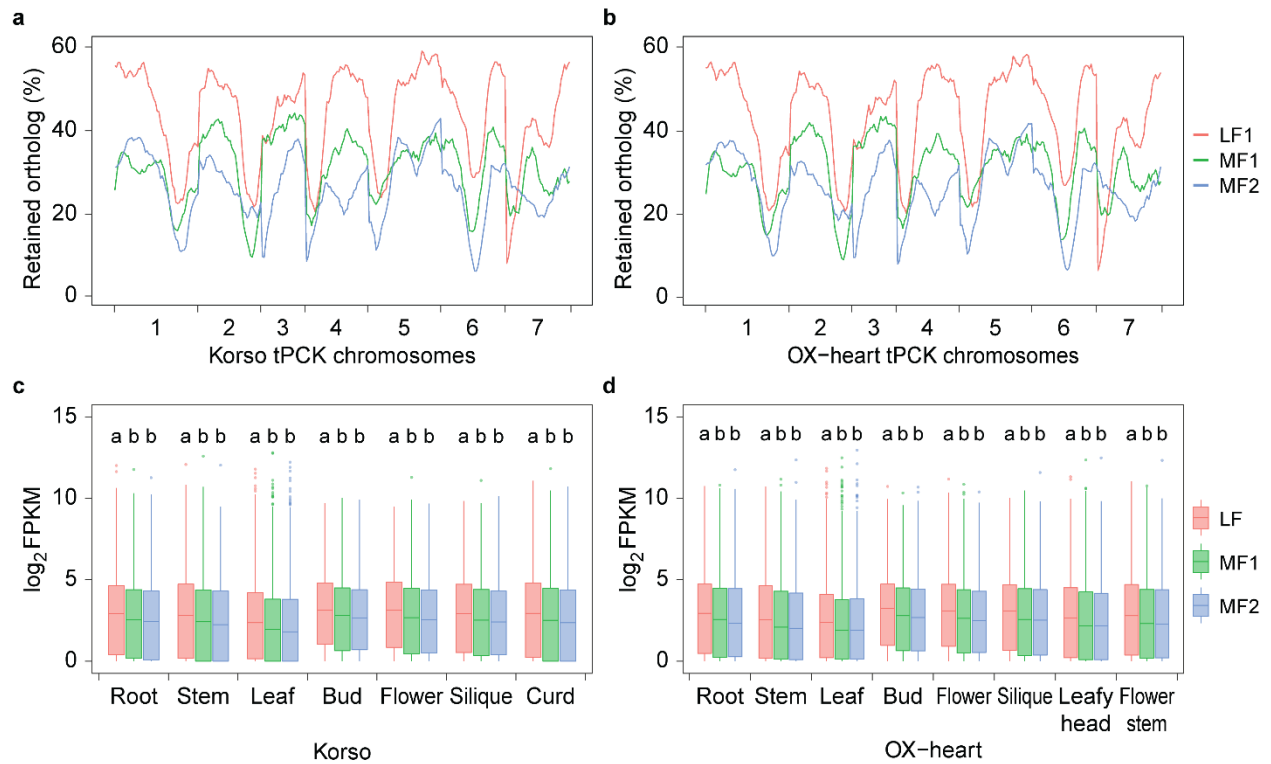

**Figure S8** Subgenomes in Korso and OX-heart. **a,b**, Percentage of retained gene orthologs in the three subgenomes (LF, MF1 and MF2) of Korso (**a**) and OX-heart (**b**). The x axis denotes the seven supposed translocated Proto-Calepine Karyotypes (tPCK1-7). **c,d**, Expression of genes with orthologs identified in all three subgenomes in different tissues of Korso (**c**) and OX-heart (**d**). Group labeled with different letters indicate significant difference at  $P < 0.05$  (Tukey's HSD test).



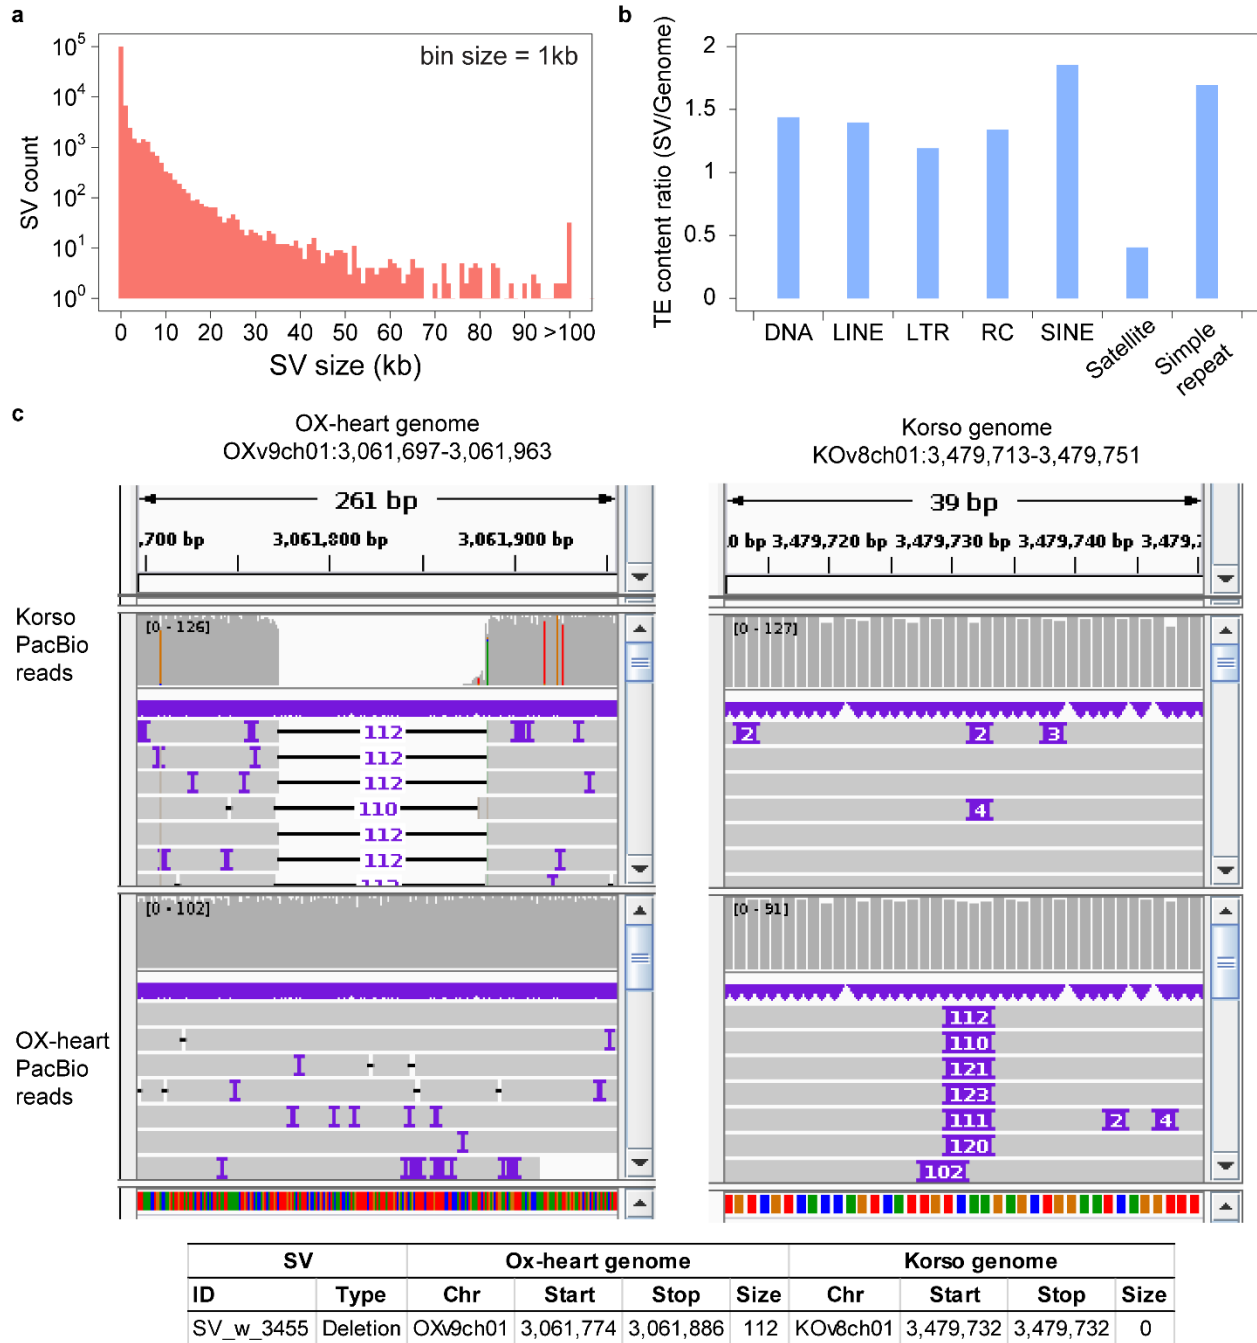

**Figure S9** Detected SVs between the genomes of Korso and the OX-heart. **a**, Size distribution of detected SVs. **b**, Ratios of transposable element contents in SV regions to those in the entire genomes. **c**, Integrative Genomics Viewer (IGV) screenshots showing an example of the detected SV supported by the PacBio reads. PacBio reads from Korso and OX-heart were aligned to OX-heart (left) and Korso (right) genome, respectively. The expected deletion can be seen on the alignments of Korso reads on OX-heart genome (top left), whereas the expected insertion appears on that of OX-heart reads on Korso genome (bottom right). We manually checked 250 randomly selected SVs and confirmed 245 (98%) of them under IGV.

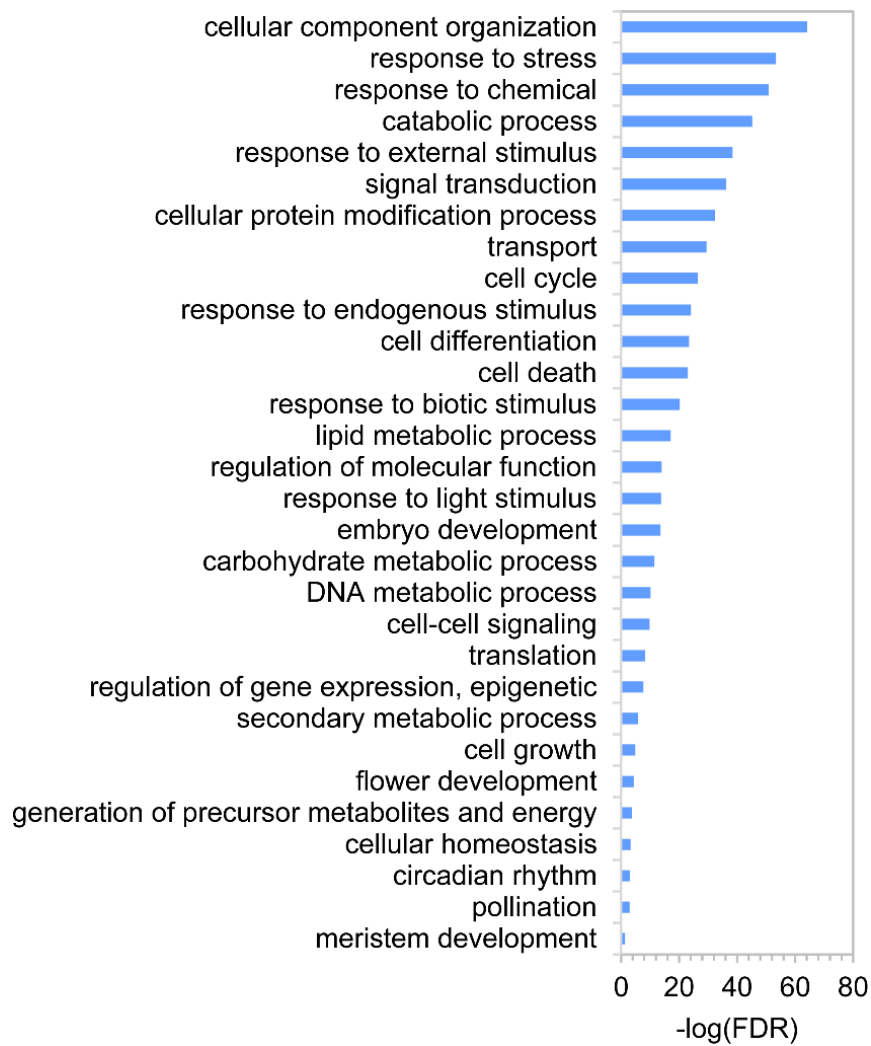

**Figure S10** Significantly enriched GO terms in genes overlapping with detected SVs in their gene body and/or promoter regions

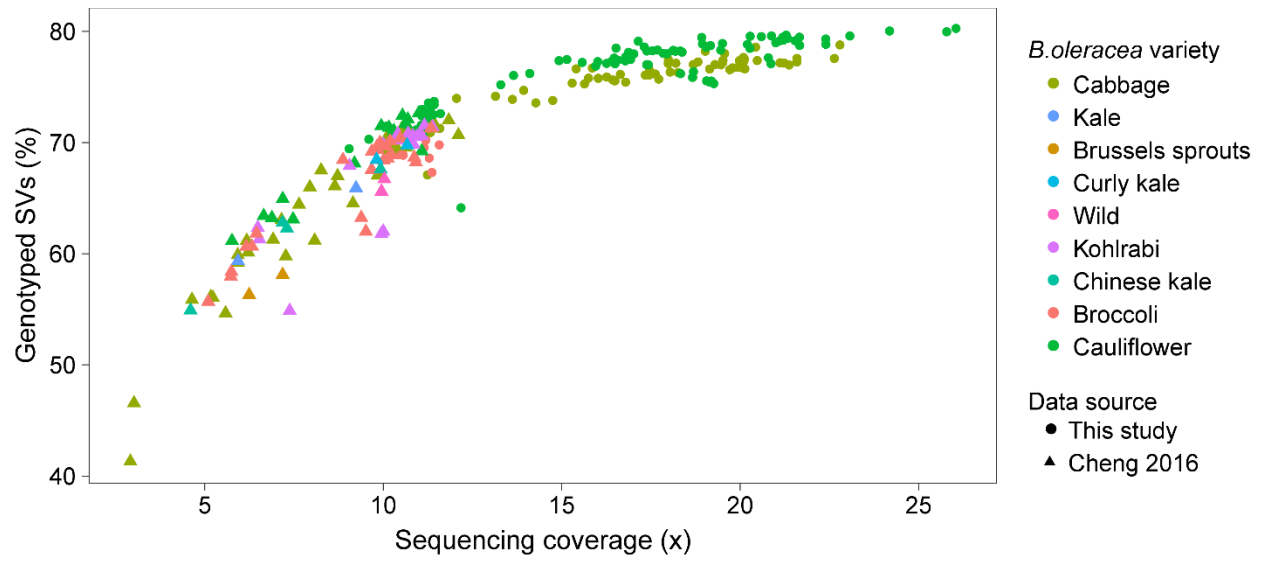

**Figure S11** Distribution of SV genotyping rates in 271 *B. oleracea* accessions.

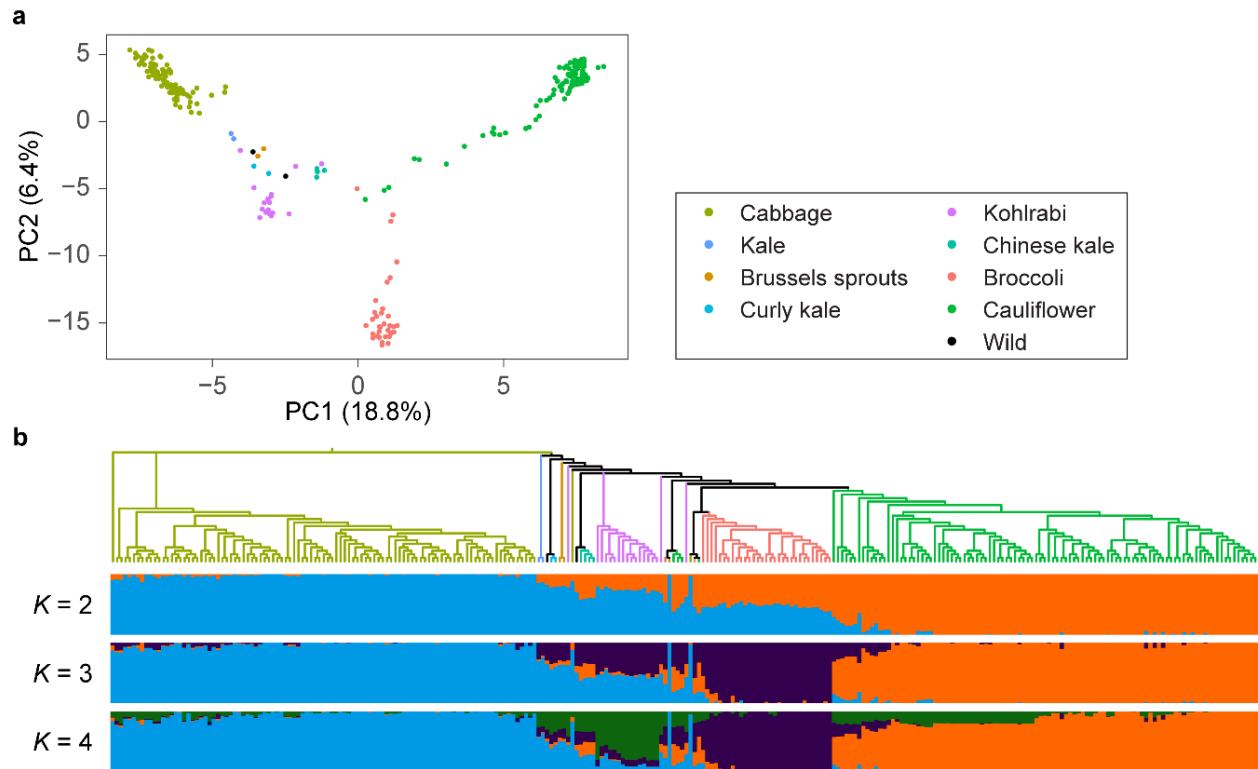

**Figure S12** Population analysis of the 271 *B. oleracea* accessions using SNPs. **a**, Principal component analysis of *B. oleracea* accessions. **b**, Neighbor joining phylogenetic tree and population structure of the 271 *B. oleracea* accessions. Branch colors of the tree indicate different morphotypes as in **a**. *K*, number of ancestral kinships.

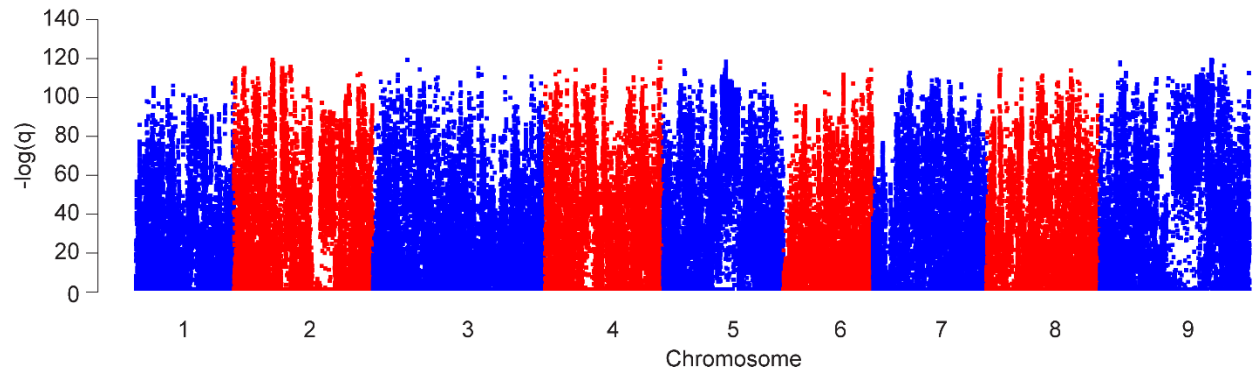

**Figure S13** Manhattan plot displaying the  $-\log(q)$  of allele variations between cabbage and cauliflower for SVs across the Korso genome.  $q$ -value, Bonferroni-corrected  $p$  value of Fisher's exact test.

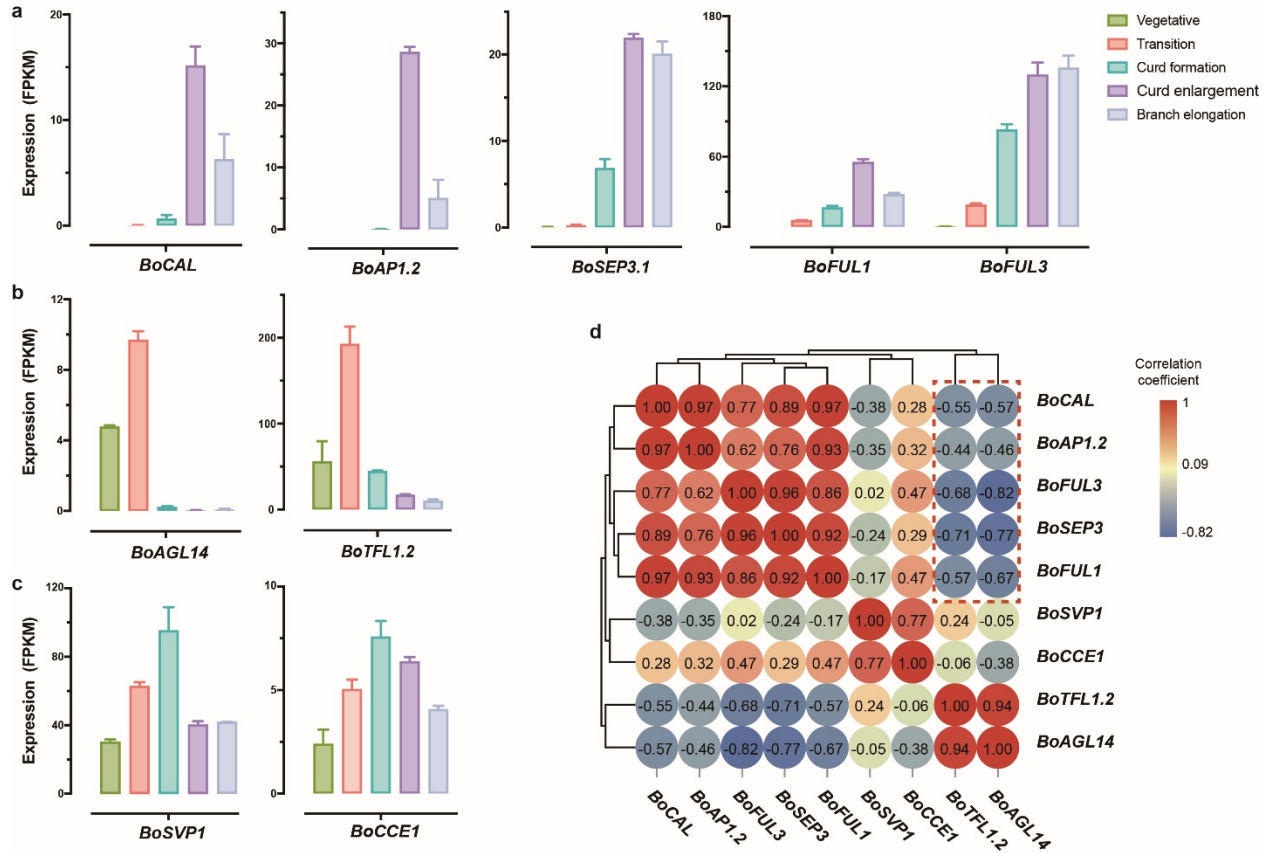

**Figure S14** Expression profiles of genes potentially involved in curd maintenance and floral arrest. **a**, Expression profiles of FMI genes *BoCAL*, *BoAP1.2*, *BoSEP3.1*, *BoFUL1* and *BoFUL3*. **b**, Expression profiles of the IMI gene *BoTFL1.2* and its positive regulator *BoAGL14*. **c**, Expression profiles of the putative floral arrest genes *BoSVP1* and *BoCCE1*. **d**, Correlation heatmap of the gene expression profiles during curd development. The red dash square highlights the negative correlation between *BoAGL14*, *BoTFL1.2* and the FMI genes.
